# Supplementary material for: Theoretical investigation on the promotion of second harmonic generation from chalcopyrite family AIGaS2to AIIGa2S4
Source: Royal Society of Chemistry journal article supplement (doi:10.1039/c9ra09109b), 2019-01-01
Supplement: c9ra09109b1.pdf [file c9ra09109b1.pdf]

## Electronic Supplementary Information

### Theoretical investigation on the promotion of second harmonic generation from chalcopyrite family $A^I\text{GaS}_2$ to $A^{II}\text{Ga}_2\text{S}_4$

Alimujiang Yalikun <sup>a</sup>, Ming-Hsien Lee <sup>b</sup>, Mamatrishat Mamat <sup>a\*</sup>

<sup>a</sup> School of Physics and Technology, Xinjiang University, Urumqi, Xinjiang 830046, P. R. China

\* E-mail: mmtrxt@xju.edu.cn

<sup>b</sup> Department of Physics, Tamkang University, New Taipei 25137, Taiwan

\*These authors contributed equally to this work.

\*Corresponding author: E-mail: mmtrxt@xju.edu.cn

### Contents supplementary tables and figures

**Table S1.** Calculated and experimental Crystal data for  $A^I\text{GaS}_2$  ( $A^I=\text{Ag}, \text{Cu}$ ),  $A^{II}\text{Ga}_2\text{S}_4$  ( $A^{II}=\text{Hg}, \text{Zn}$ ).

**Table S2.** Calculated results of bond angles and REDA index.

**Fig. S1.** Calculated results of bandgap.

**Fig. S2.** Calculated results of Birefringence.

**Table. S1.** Crystal data for A<sup>I</sup>GaS<sub>2</sub> (A<sup>I</sup>=Ag, Cu), A<sup>II</sup>Ga<sub>2</sub>S<sub>4</sub> (A<sup>II</sup>=Hg, Zn)

| Compound                         | Crystal system | Space group   | a (Å) |      | b (Å) |      | c (Å) |       |
|----------------------------------|----------------|---------------|-------|------|-------|------|-------|-------|
|                                  |                |               | Exp   | cal. | Exp   | cal. | Exp   | cal.  |
| AgGaS <sub>2</sub>               | Tetragonal     | $\bar{I}4_2d$ | 5.76  | 5.75 | 5.76  | 5.75 | 10.30 | 10.69 |
| CuGaS <sub>2</sub>               | Tetragonal     | $\bar{I}4_2d$ | 5.35  | 5.47 | 5.35  | 5.47 | 10.47 | 10.47 |
| HgGa <sub>2</sub> S <sub>4</sub> | Tetragonal     | $\bar{I}4$    | 5.51  | 5.59 | 5.51  | 5.59 | 10.24 | 10.50 |
| ZnGa <sub>2</sub> S <sub>4</sub> | Tetragonal     | $\bar{I}4$    | 5.28  | 5.47 | 5.26  | 5.47 | 10.44 | 10.54 |

**Table. S2.** Bond angles and REDA index for AgGaS<sub>2</sub>, CuGaS<sub>2</sub>, HgGa<sub>2</sub>S<sub>4</sub>, ZnGa<sub>2</sub>S<sub>4</sub>

| Compound                         | Bond                     | Bond angle           | REDA   |
|----------------------------------|--------------------------|----------------------|--------|
| AgGaS <sub>2</sub>               | Ag-S                     | 106°-116°            | 0.330  |
|                                  | Ga-S                     | 109°                 | 0.031  |
|                                  | Total <sub>AgGaS2</sub>  | /                    | 0.361  |
| CuGaS <sub>2</sub>               | Cu-S                     | 109°-110°            | 0.062  |
|                                  | Ga-S                     | 109°                 | -0.006 |
|                                  | Total <sub>CuGaS2</sub>  | /                    | 0.056  |
| HgGa <sub>2</sub> S <sub>4</sub> | Hg-S                     | 108°-111°            | 0.091  |
|                                  | Ga-S(1)(2)               | 104°-112°, 105°-117° | 0.138  |
|                                  | Total <sub>HgGa2S4</sub> | /                    | 0.230  |
| ZnGa <sub>2</sub> S <sub>4</sub> | Zn-S                     | 109°-110°            | 0.027  |
|                                  | Ga-S(1)(2)               | 106°-111°, 106°-115° | 0.055  |
|                                  | Total <sub>ZnGa2S4</sub> | /                    | 0.083  |

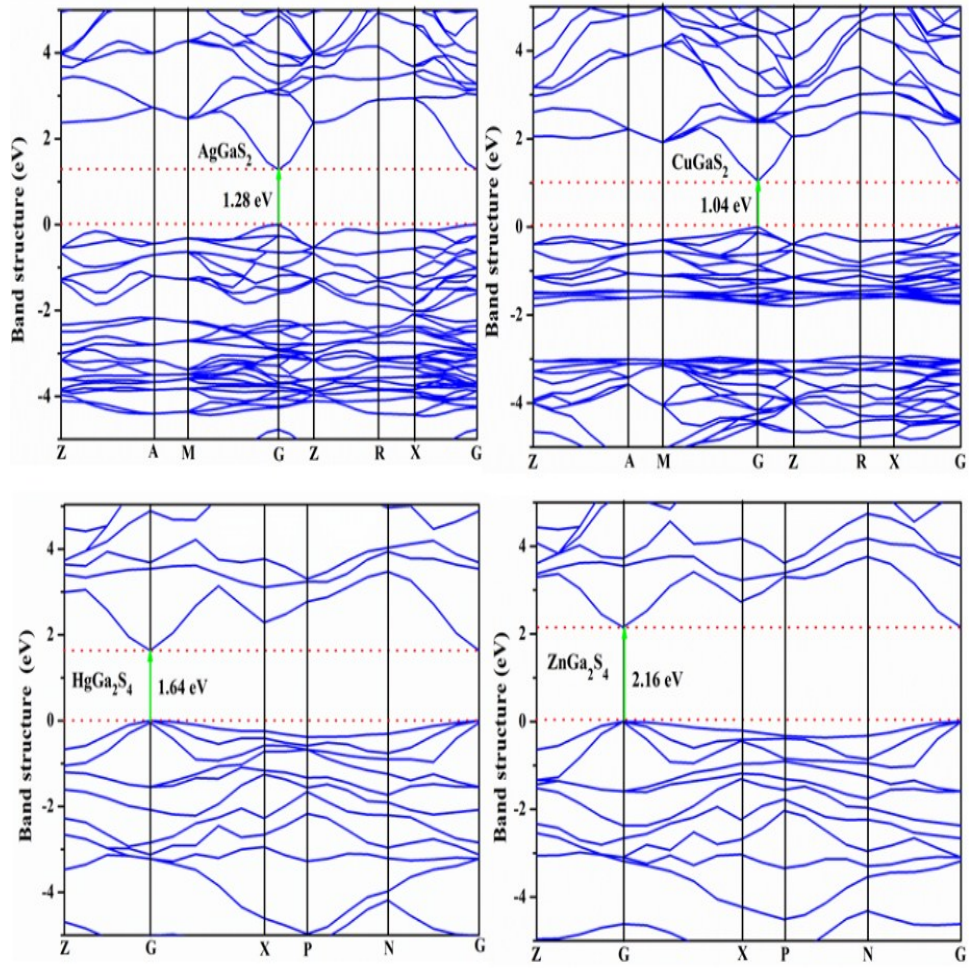

**Fig. S1.** Band structure of AgGaS<sub>2</sub>, CuGaS<sub>2</sub>, HgGa<sub>2</sub>S<sub>4</sub>, ZnGa<sub>2</sub>S<sub>4</sub>

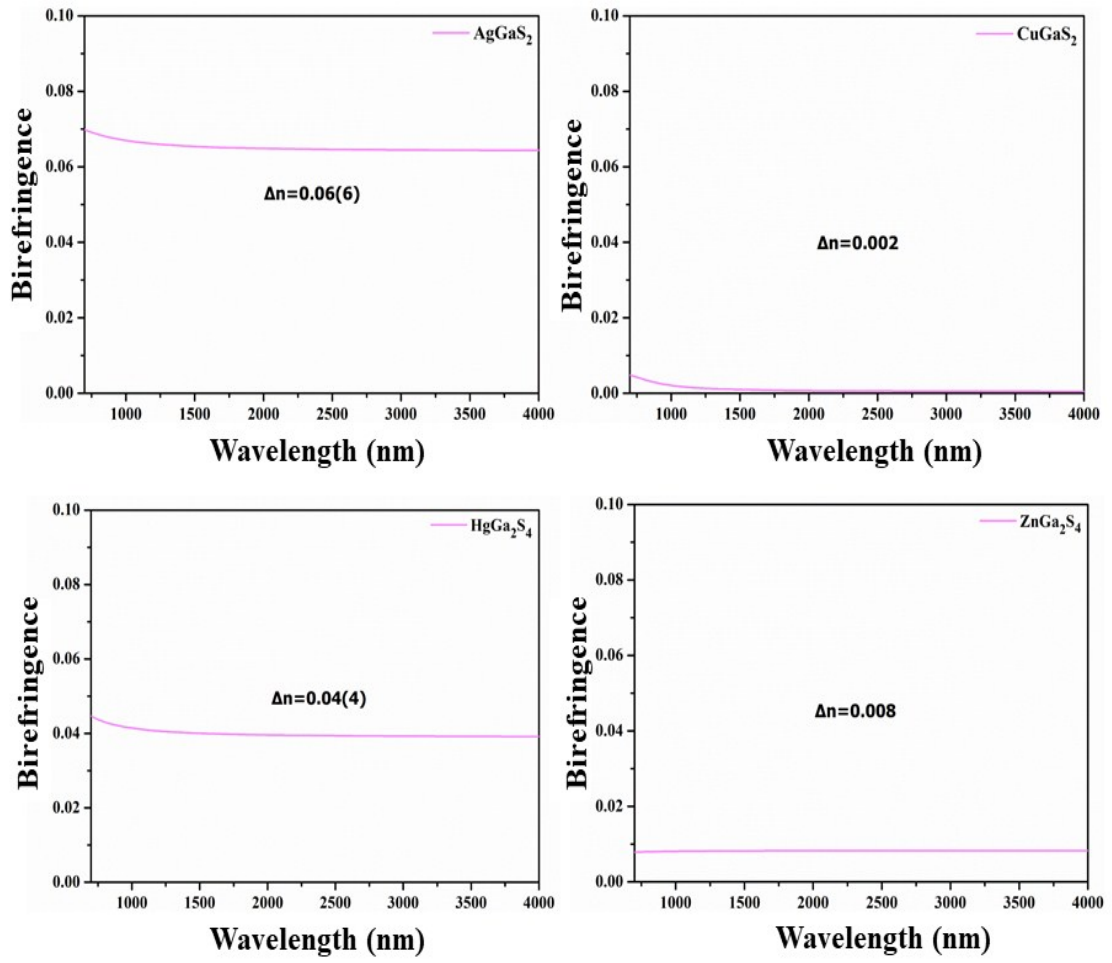

Fig. S2. Calculated Birefringence of  $\text{AgGaS}_2$ ,  $\text{CuGaS}_2$ ,  $\text{HgGa}_2\text{S}_4$ ,  $\text{ZnGa}_2\text{S}_4$
